# Supplementary material
Source: publisher site journal article supplement (https://www.dovepress.com/article/479675)
Supplement: Supplementary file 1 [file get_supplementary_file.php]

**LIST OF SUPPLEMENTARY DOCUMENTS**

**Supplementary table S1. Primary antibodies for WB, IHC and IF.**

**Supplementary table S2. Sequence of Primers for qRT-PCR.**

**Supplementary Figure S1. The effect of PD on NSCLC cell viability**

**Supplementary Figure S2. Cell uptake study of homogenous tumor cell membrane-coated PD delivery system**

**Supplementary Figure S3. Hemolysis analysis of PD and PD@A549-m on red blood cells**

**Table S1. Primary antibodies for WB, IHC and IF.**

| Antibody | Concentration  for WB | Concentration  for IHC | Concentration  for IF | Specificity |
| --- | --- | --- | --- | --- |
| GSK3β | 1:1000 | 1:100 | 1:100 | Mouse |
| p- GSK3β(Ser9) | 1:500 |  |  | Rabbit |
| N-cadherin | 1:1000 |  |  | Mouse |
| E-cadherin | 1:1000 |  |  | Rabbit |
| Vimentin | 1:1000 |  |  | Mouse |
| FUT9 | 1:1000 | 1:100 | 1:100 | Rabbit |
| p-Akt | 1:500 |  |  | Rabbit |
| Akt | 1:1000 |  |  | Rabbit |
| β-catenin | 1:1000 |  |  | Mouse |
| GAPDH | 1:2000 |  |  | Mouse |
| Ki67 |  | 1:100 |  | Rabbit |

Abbreviations: Western blotting (WB), Immunochemistry (IHC), Immunofluorescence (IF)

**Table S2. Sequence of Primers for** **qRT-PCR.**

| Primers |  | Sequences (5’------3’) |
| --- | --- | --- |
| FUT9 | Forward | 5’- ATCCAAGTGCCTTATGGCTTCT-3’ |
|  | Reverse | 5’- TGCTCAGGGTTCCAGTTACTCA-3’ |
| hsa-miR-1246 | Forward | 5’- GCGGCAATGGATTTTTGG-3’ |
|  | Reverse | 5’-GTCGTATCCAGTGCGTGTCGTGGAGTCGGCAATTGCACTGGATACGACCCTGCT-3’ |
| hsa-miR-219-5p | Forward | 5’- CGGCTGATTGTCCAAACGC-3’ |
|  | Reverse | 5’- GTCGTATCCAGTGCGTGTCGTGGAGTCGGCAATTGCACTGGATACGACAGAATT-3’ |
| hsa-miR-598-3p | Forward | 5’- CGGCTACGTCATCGTTGTCA-3’ |
|  | Reverse | 5’- GTCGTATCCAGTGCGTGTCGTGGAGTCGGCAATTGCACTGGATACGACTGACGA-3’ |
| hsa-miR-9-5p | Forward | 5’- GCGGCTCTTTGGTTATCTAGCT-3’ |
|  | Reverse | 5’- GTCGTATCCAGTGCGTGTCGTGGAGTCGGCAATTGCACTGGATACGACTCATAC-3’ |
| hsa-miR-31-5p | Forward | 5’-GCAGGCAAGATGCTGGCA-3’ |
|  | Reverse | 5’-GTCGTATCCAGTGCGTGTCGTGGAGTCGGCAATTGCACTGGATACGACCAGCTA-3’ |
| hsa-miR-210-3p | Forward | 5’-GGCCTGTGCGTGTGACAGC-3’ |
|  | Reverse | 5’-GTCGTATCCAGTGCGTGTCGTGGAGTCGGCAATTGCACTGGATACGACTCAGCC-3’ |
| hsa-miR-196a-5p | Forward | 5’- CGCGGCTAGGTAGTTTCATGTT-3’ |
|  | Reverse | 5’- GTCGTATCCAGTGCGTGTCGTGGAGTCGGCAATTGCACTGGATACGACCCCAAC-3’ |
| hsa-miR-130a-5p | Forward | 5’- GCGGCTTCACATTGTGCTACT-3’ |
|  | Reverse | 5’- GTCGTATCCAGTGCGTGTCGTGGAGTCGGCAATTGCACTGGATACGACGCAGAC-3’ |
| hsa-miR-1-3p | Forward | 5’- CCGGCTGGAATGTAAAGAAGT-3’ |
|  | Reverse | 5’- GTCGTATCCAGTGCGTGTCGTGGAGTCGGCAATTGCACTGGATACGACATACAT-3’ |
| Common-R |  | CAGTGCGTGTCGTGGAGT |
| GAPDH | Forward | 5’-AGATCCCTCCAAAATCAAGTGG-3’ |
|  | Forward | 5’-GGCAGAGATGATGACCCTTTT-3’ |
| U6 | Forward | 5’-CTCGCTTCGGCAGCACA-3’ |
|  | Reverse | 5’-AACGCTTCACGAATTTGCGT-3’ |
| miR-1246-inhibitor |  | CCUGCUCCAAAAAUCCAUU |
| miR-124-inhibitor-R |  | UGCUCCAAAAAUCCAUUUU |
| miR-1246-mimic |  | AAUGGAUUUUUGGAGCAGG |

**
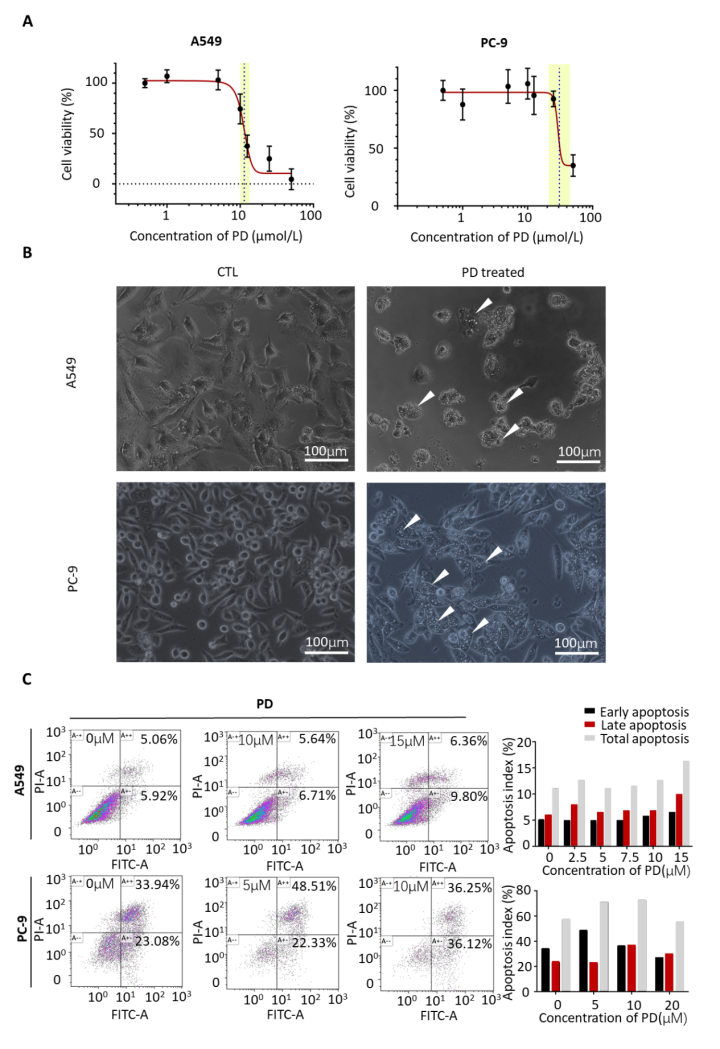
**

**Supplementary Figure S1**

**The effect of PD on NSCLC cell viability**

The MTT method was used to measure the cytotoxic effect of PD on A549 cells and PC-9 cells after 48 h incubation. A549 IC50: 11 ± 0.95 μmol/L, PC-9 cells IC50: 29 ± 7 μmol/L.


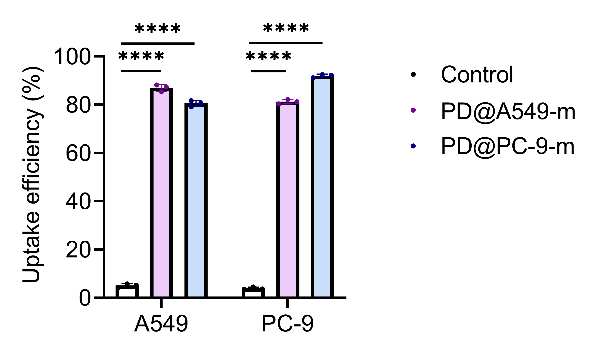


**Supplementary Figure S2**

**Cell uptake study of homogenous tumor cell membrane-coated PD delivery system**

Uptake efficiency of formulations in A549 and PC-9 cells were added to 12-well plates and cultured

overnight (N=3). Saline, formulations of PD@A549-m and PD@PC-9-m labeled by Dio with

serum-free fresh culture media were co-incubated with cells for 48 h, after washing, uptake


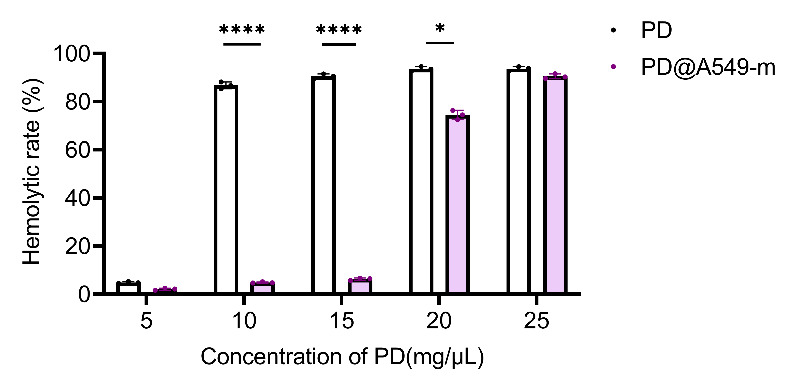
efficiency of cells was tested using flow cytometer. Data are shown as mean ± SD, ****P<0.0001.

**Supplementary Figure S3**

**Hemolysis analysis of PD and PD@A549-m on red blood cells**

Hemolytic rate of PD and PD@A549-m at different concentrations equal to PD (N=3). The absorbance of liquid was determined at 545nm by spectrophotometer to calculate the hemolytic rate.

Hemolytic rate (%) =(As-A0)/(Ap-A0) * 100% (As, A0 and Ap were the absorbance of samples,

negative control and positive control respectively.) Each value represented as mean ± SD, *P<0.05,

****P<0.0001.
